# Supplementary material
Source: publisher site journal article supplement (https://www.dovepress.com/get_supplementary_file.php?f=345143.docx)
Supplement: Supplementary file 1 [file get_supplementary_file.php]

**Supplementary Table 1: Follow-up variables with missing numbers (n = 45)**

| Variables | Baseline | At 6 Months | P value: baseline vs 6 months | At 12 months | P-value: baseline vs 12 months |
| --- | --- | --- | --- | --- | --- |
| Age, years n | 18.0 (17.0-18.0) | 18.0 (18.0-19.0) | **<0.0001** | 19.0 (18.0-19.0) | **<0.0001** |
| BMI, kg/m2 | 30.3 (24.0-37.1) | 30.3 (24.1-37.1)  Missing = 9 | 0.152 | 29.2 (22.8-31.9)  Missing = 17 | 0. 667 |
| Living Independently: Yes | 1 (2.2) | 3 (6.7) | 0.157 | 6 (13.3) | **0.025** |
| **Education/Work Status** |  |  |  |  |  |
| 2nd level education | 27 (60.0) | 22 (48.9) | 0.156 | 13 (28.9) | **0.006** |
| 3rd level education | 12 (26.7) | 9 (20.0) |  | 15 (33.3) |  |
| Working | 3 (6.7) | 6 (13.3) |  | 7 (15.6) |  |
| Not working/not in school | 3 (6.7) | 8 (17.8) |  | 10 (22.2) |  |
| **Questionnaires** |  |  |  |  |  |
| Epworth Sleepiness Score | 7.5 (3.0-10.0)  Missing =3 | 8.0 (4.0-14.0)  Missing = 28 | 0.219 | 5.0 (0.5-10.0)  Missing = 18 | 0.643 |
| Fatigue Severity Scale | 4.0 (1.9-5.1)  Missing =3 | 4.0 (3.0-6.0)  Missing = 28 | 0.185 | 3.4 (2.5-4.6)  Missing = 18 | 0.914 |
| Insomnia severity score | 6.0 (2.0-8.0)  Missing =3 | 8.0 (4.0-10.0)  Missing = 28 | 0.755 | 4.0 (1.0-7.0)  Missing = 18 | 0.406 |
| PHQ-9 Score | Missing =3  2.0 (1.0-7.0) | Missing = 28  5.0 (1.0-7.0) | 0.793 | Missing = 18  1.0 (0.0-7.0) | 1.0 |
| Generalized Anxiety Disorder-7 Score | 1.5 (0.0-3.8)  Missing =3 | 3.0 (0.0-11.0)  Missing = 28 | 0.330 | 1.0 (0.0-6.0)  Missing = 18 | 0.722 |
| Pittsburgh sleep quality index score | 3.5 (1.0-5.3)  Missing =5 | 3.0 (2.0-8.0)  Missing = 28 | 1.0 | 3.0 (3.0-5.8)  Missing = 19 | 0.259 |
| Positive Airway Pressure Perception Score | 16 (8-32)  Missing =4 | 22 (11-37)  Missing = 28 | **0.020** | 15 (9-34)  Missing = 18 | 0.061 |
| EQ-5D-5L | 0.95 (0.85-0.95)  Missing =5 | 0.95 (0.91-0.95)  Missing = 28 | 0.528 | 0.95 (0.80-0.95)  Missing = 18 | 0.906 |
| EQ-VAS | 80 (65-90)  Missing =5 | 70 (50-80)  Missing = 28 | **0.043** | 80 (70-90)  Missing = 19 | 0.539 |

Values are median and interquartile range for categorical variables and for number (percentage) for continuous variables.

Abbreviations: n, number; %, percentage; BMI, body mass index; h, hour; AHI, apnea-hypopnea index; SpO2, oxygen saturation, IQR, interquartile range, EQ-5D-5L, European quality of life score; EQ-VAS, European quality of life visual analogue scale.

Epworth Sleepiness score, ≥ 10/24 indicating sleepiness; Pittsburgh sleep quality index score >5/21 indicates worse sleep quality; Insomnia severity scale > 7/28, indicating possible insomnia; fatigue severity scale, total score 9 with a higher score indicating more fatigue; Generalized anxiety disease-7 score, >5/21 indicating moderate to severe anxiety; Patient Health Questionnaire-9 score, >10/20 indicating depression; Positive Airway Pressure Perception Score, >16/60 indicates poorer perception of positive airway pressure therapy; EQ-5D-5L, range -0.148 for the worst to 0.949 for the best standardized to Canadian normative values, EQ-VAS, range 0 -100, the higher the score the better the patient’s self-rated health. Statistically significant values are highlighted in bold font.

**Supplementary Table 2: The effect of other variables statistically significantly associated with objective measures of positive airway pressure (PAP) treatment adherence at 12 months, controlling for confounders.**

| **Other variables significantly associated with PAP usage in days used (hours)**: | |
| --- | --- |
| **Model 2** | **Estimates (95% Confidence Interval)** |
| Ethnicity: Asian (vs. white) | -3.25 (-5.35 to -1.18); |
| Ethnicity: Others (vs. white) | -3.68 (-5.93 to -1.47); |
| Anxiety/Depression (vs. not) | -2.51 (-4.96 to -0.11) |
| **Model 3** |  |
| Increase in Minimum SpO2 (%), one unit | -0.14 (-0.24 to -0.04) |
| **Model 4** |  |
| Increase in one unit in Positive Airway Pressure Perception Score | -0.07 (-0.12 to -0.02) |
|  |  |
| **Other variable significantly associated with Percentage of days of PAP usage** | |
| **Model 2** | **Estimates (95% Confidence Interval)** |
| Living independently (vs. not) | -18.77 (-38.87 to -0.57) |
| Ethnicity: Asian (vs. white) | -31.80 (-56.64 to -7.32) |
| Ethnicity: Others (vs. white) | -49.26 (-75.92 to -23.02) |
| **Model 3** |  |
| Living independently (vs. not) | -28.57 (-47.33 to -9.74) |
| **Model 4** |  |
| Living independently (vs. not) | -26.41 (-49.95 to -3.36) |
| Increase in one unit in Positive Airway Perception Score | -0.92 (-1.42 to -0.40) |

Model 2: Model 1 + variables available at baseline: time on positive airway pressure therapy before transition, sex, ethnicity, a history of tonsillectomy and comorbidities with less than 10% of missing values: genetic conditions, congenital heart failure, asthma, dyslipidemia, anxiety/depression, neurological and endocrine conditions.

Model 3: Model 1 + OSA and PAP related characteristics: baseline apnea-hypopnea index (AHI), minimum oxygen saturation (MinSpO2), mask type and residual AHI (more than 10% of missing values).

Model 4: Model 1 + other variables that can change overtime with more than 10% of missing values, which were associated with changes overtime in the univariate analyses at p-value of 0.2 or lower: weight, height, Fatigue severity scale, Epworth sleepiness scale, Positive airway pressure perception score and EQ-VAS.
